# Supplementary material for: MicroRNA-guided regulation of heat stress response in wheat
Source: BMC Genomics. 2019 Jun 13;20:488. doi: 10.1186/s12864-019-5799-6 (PMC6567507; doi:10.1186/s12864-019-5799-6)
Supplement: Supplementary file 1 — Table S1 Sequencing and processing summary of the 24 small RNA libraries. (XLSX 19 kb) [file 12864_2019_5799_MOESM1_ESM.xlsx]

## Sheet: Table_S1
Additional file 1 (xlsx) Table S1 Sequencing and processing summary of the 24 small RNA libraries.
						Non-redundant dataset	Removal of chloroplast and other non-coding RNAs		Distinct tags with ≥ 10 RPM in at least one library		Non-redundant miRNA sequence dataset
Small RNA library	Treatment	Sampling time (Days after end of treatment)	Replicate	Raw reads	High quality reads (18-24nt)	Distinct tags	Raw reads	Distinct tags	Raw reads	Distinct tags	Raw reads	Distinct miRNAs
1	Control	0	R1	5970799	2750533	954188	1933545	879381	824896	9219	150884	198
2	Control	0	R2	4237097	2544870	778347	1720721	708683	832223	9122	133591	202
3	Control	0	R3	3502427	1552154	524463	995929	466368	445979	8491	58501	198
4	Control	0	R4	5342613	2927273	1004760	2118522	933114	910055	8960	208454	200
5	Control	1	R1	4150082	2934923	985481	2120883	911299	958060	9194	225459	197
6	Control	1	R2	3512570	2154981	792512	1571977	734370	649214	9062	98774	200
7	Control	1	R3	3169696	1828785	726806	1340601	671117	513777	8460	72458	197
8	Control	1	R4	4384900	2143535	705263	1503892	642897	713393	9249	140993	198
9	Control	4	R1	2247854	1587963	658022	1224390	611595	456072	9108	81830	193
10	Control	4	R2	2301786	1648140	669154	1330049	625527	566265	9011	148215	197
11	Control	4	R3	5902097	3952149	1401755	3030940	1321306	1266022	9179	268855	200
12	Control	4	R4	6163070	3593651	1311527	2627736	1227974	1007146	8573	184474	201
13	Heat	0	R1	1528969	956424	317574	647927	277558	334770	8297	68947	195
14	Heat	0	R2	3129764	1986984	636168	1275706	572729	570692	8449	86945	200
15	Heat	0	R3	5886557	3137581	743344	1702070	653684	868662	8709	123731	199
16	Heat	0	R4	3045830	1647339	591023	1108414	535984	465965	8479	74169	198
17	Heat	1	R1	3482860	1791632	606047	1263348	545317	603655	8424	127692	201
18	Heat	1	R2	5973802	3224787	1091521	2407987	1015263	1062042	8701	157709	200
19	Heat	1	R3	2944093	1696211	547630	1144774	489163	565942	8476	141744	201
20	Heat	1	R4	3388005	2013752	677396	1419205	608320	665517	8713	129484	201
21	Heat	4	R1	3862012	1753717	609297	1310602	561616	630910	8581	145117	201
22	Heat	4	R2	2904179	1654728	558267	1217373	507838	604555	8576	177003	201
23	Heat	4	R3	2594652	1645953	551665	1137373	498320	543190	8914	115904	199
24	Heat	4	R4	6341798	4106845	1247984	2741018	1143280	1216329	8526	300261	202
Total				95967512	55234910	18690194	38894982	17142703	17275331	9500	3421194	202
