# Supplementary material for: MicroRNA-guided regulation of heat stress response in wheat
Source: BMC Genomics. 2019 Jun 13;20:488. doi: 10.1186/s12864-019-5799-6 (PMC6567507; doi:10.1186/s12864-019-5799-6)
Supplement: Supplementary file 13 — Table S6. List of predicted interaction partners for degradome validated miRNA targets identified in rice (Oryza sativa) using STRING DB. (XLSX 15 kb) [file 12864_2019_5799_MOESM13_ESM.xlsx]

## Sheet: Table S6
Additional file 13 (.xlsx) Table S6 List of predicted interaction partners for degradome validated miRNA targets identified in rice (Oryza sativa) using STRING DB.
Protein	Annotation
OsI_30285	Putative uncharacterized protein [source-UniProtKB/TrEMBL;Acc-A2YY59_ORYSI]; Destroys radicals which are normally produced within the cells and which are toxic to biological systems (203 aa)
OsI_18876	Putative uncharacterized protein (481 aa)
OsI_17049	Putative uncharacterized protein [source-UniProtKB/TrEMBL;Acc-B8AT52_ORYSI] (312 aa)
OsI_19472	Putative uncharacterized protein [source-UniProtKB/TrEMBL;Acc-B8AWM4_ORYSI]; Destroys radicals which are normally produced within the cells and which are toxic to biological systems (231 aa)
OsI_21593	Putative uncharacterized protein [source-UniProtKB/TrEMBL;Acc-B8B2C9_ORYSI]; Destroys radicals which are normally produced within the cells and which are toxic to biological systems (255 aa)
OsI_21381	Putative uncharacterized protein [source-UniProtKB/TrEMBL;Acc-B8B1M4_ORYSI] (391 aa)
OsI_08201	Putative uncharacterized protein (787 aa)
OsI_16304	Putative uncharacterized protein [source-UniProtKB/TrEMBL;Acc-B8AVG0_ORYSI] (313 aa)
OsI_33947	Putative uncharacterized protein (353 aa)
OsI_22845	Putative uncharacterized protein [source-UniProtKB/TrEMBL;Acc-A2YCK4_ORYSI] (568 aa)
OsI_21203	Putative uncharacterized protein [source-UniProtKB/TrEMBL;Acc-A2Y831_ORYSI] (581 aa)
OsI_06809	Putative uncharacterized protein [source-UniProtKB/TrEMBL;Acc-A2X3L6_ORYSI] (565 aa)
OsI_01051	Putative uncharacterized protein [source-UniProtKB/TrEMBL;Acc-A2WMI3_ORYSI] (567 aa)
OsI_22225	Putative uncharacterized protein (676 aa)
OsI_06757	Putative uncharacterized protein [source-UniProtKB/TrEMBL;Acc-B8AFL9_ORYSI] (1086 aa)
OsI_22845	Putative uncharacterized protein [source-UniProtKB/TrEMBL;Acc-A2YCK4_ORYSI] (568 aa)
OsI_21203	Putative uncharacterized protein [source-UniProtKB/TrEMBL;Acc-A2Y831_ORYSI] (581 aa)
OsI_06809	Putative uncharacterized protein [source-UniProtKB/TrEMBL;Acc-A2X3L6_ORYSI] (565 aa)
OsI_01051	Putative uncharacterized protein [source-UniProtKB/TrEMBL;Acc-A2WMI3_ORYSI] (567 aa)
OsI_04228	Putative uncharacterized protein [source-UniProtKB/TrEMBL;Acc-A2WWE8_ORYSI] (646 aa)
OsI_09282	Putative uncharacterized protein [source-UniProtKB/TrEMBL;Acc-A2XAK0_ORYSI] (517 aa)
OsI_13171	Putative uncharacterized protein [source-UniProtKB/TrEMBL;Acc-B8AQ15_ORYSI] (950 aa)
OsI_26175	Putative uncharacterized protein [source-UniProtKB/TrEMBL;Acc-B8B6L7_ORYSI] (799 aa)
OsI_32743	Putative uncharacterized protein (741 aa)
OsI_38205	Bifunctional dihydrofolate reductase-thymidylate synthase [source-UniProtKB/TrEMBL;Acc-B7FA29_ORYSJ]; Bifunctional enzyme. Involved in de novo dTMP biosynthesis. Key enzyme in folate metabolism (494 aa)
OsI_36122	Putative uncharacterized protein (404 aa)
OsI_03796	Putative uncharacterized protein [source-UniProtKB/TrEMBL;Acc-B8A9S2_ORYSI] (413 aa)
OsI_18786	Putative uncharacterized protein [source-UniProtKB/TrEMBL;Acc-B8AYX7_ORYSI] (538 aa)
OsI_22080	Putative uncharacterized protein [source-UniProtKB/TrEMBL;Acc-B8B3W6_ORYSI] (391 aa)
Bold font indicates queried protein
